# Supplementary material
Source: PubMed Central journal article supplement (PMC3340287)
Supplement: supp_M111.301523_jbc.M111.301523-1.pdf [file supp_M111.301523_jbc.M111.301523-1.pdf]

# Supplemental Figure 1

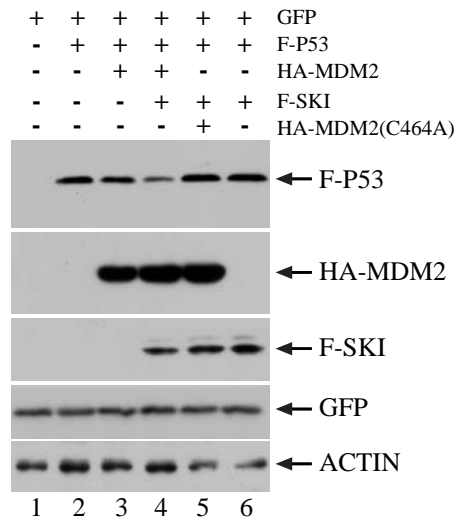

**Supplemental Figure 1.** SKI enhances decrease of P53 by MDM2 but not by mutant MDM2. Various expression plasmids were introduced into HCT116 cells, and the P53, MDM2, SKI, GFP and Actin were examined with immunoblot analysis with anti-Flag, anti-HA, anti-GFP and anti-Actin antibodies. The mutant MDM2 has alanine at 464 amino acids instead of cysteine. The amount of plasmids was made equal by adding vector DNA, and the transfection efficiency was monitored with GFP expression.

# Supplemental Figure 2

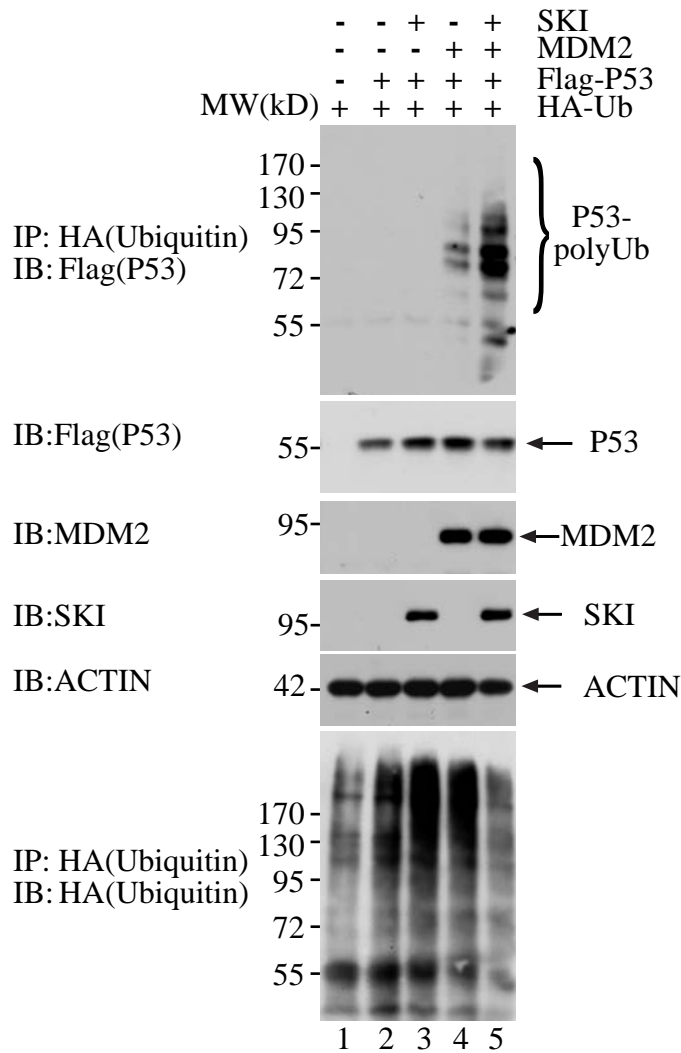

**Supplemental Figure 2.** SKI enhances MDM2-mediated P53 ubiquitination. SKI increases P53 ubiquitination by MDM2. Various plasmids were introduced into H1299 cells and the amount of plasmids was equalized with empty vector. 40 hours after transfection, the cells were treated with 20 $\mu$ M MG-132 for 4 hours and lysed with 2% SDS buffer and heated at 95 $^{\circ}$ C for 5' followed by dilution with regular buffer to 0.1% SDS and centrifugation. The supernatant was immunoprecipitated with anti-HA antibody, followed by the immunoblot analysis with anti-Flag antibody to detect P53. The blot was stripped and probed again with anti-HA antibody to reveal the Ubiquitin immunoprecipitates in the bottom panel. A separate portion of the lysate was used to analyze the expression level of P53, MDM2, SKI and ACTIN.

Supplemental Figure 3

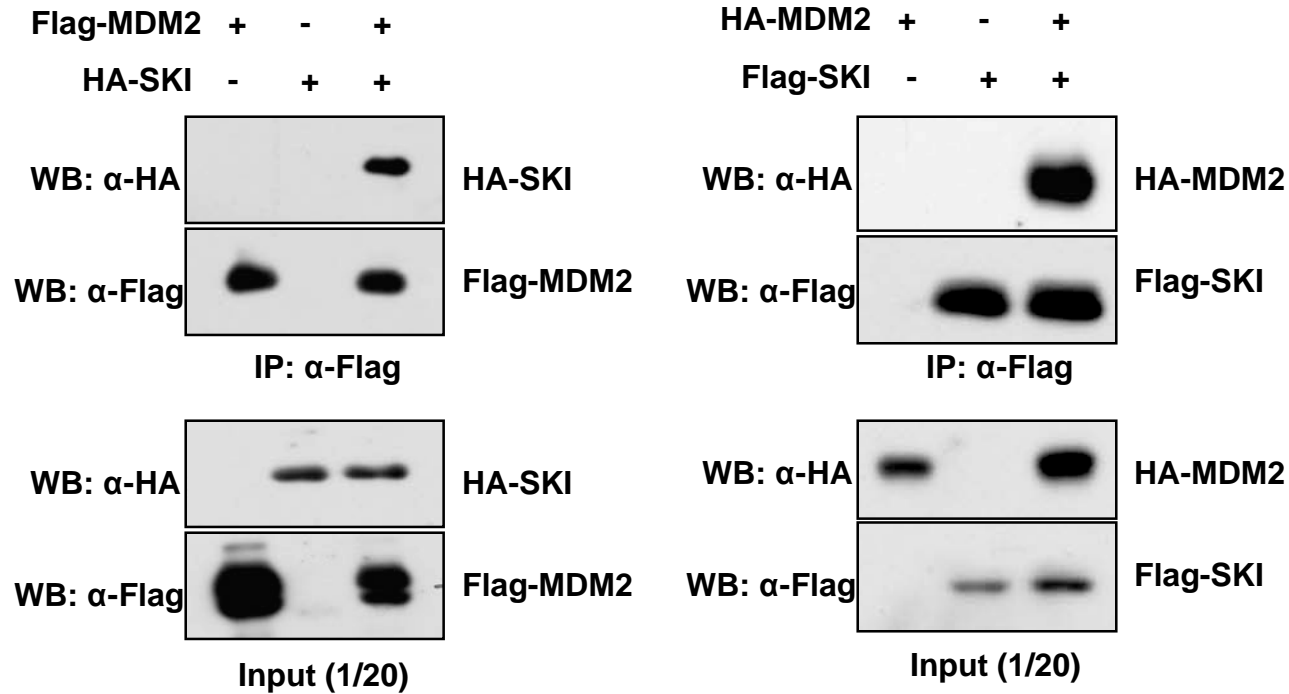

**Supplemental Figure 3.** SKI interacts with MDM2. SKI and MDM2 can form a complex upon overexpression. Expression plasmids for SKI and MDM2 were introduced into H1299 cells followed by cell lysis and immunoprecipitation with anti-Flag antibody to isolate SKI or MDM2. The associated proteins were analyzed with immunoblot using anti-HA antibody.

# Supplemental Figure 4

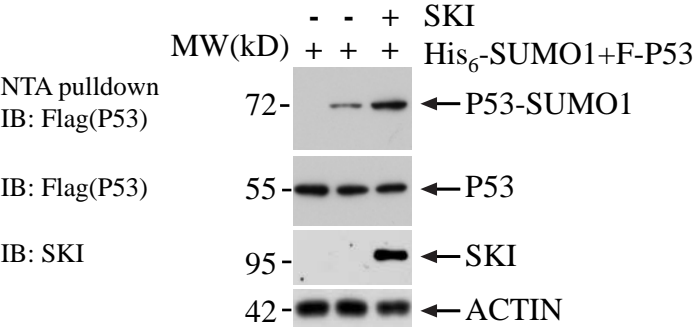

**Supplemental Figure 4.** SKI enhances P53 sumoylation. Expression plasmids for SKI and P53 and His-tagged SUMO1 were introduced into H1299 cells for 40 hours. The cells were lysed as in Figure 4A followed by immunoblot analysis with anti-Flag antibody. A separate portion of the lysate was analysed with antibodies for Flag, SKI and ACTIN.
